# Supplementary material for: Novel LC-MS/MS Method for Measuring Methotrexate in High-Dose Therapy: A Comparative Study with Commercial EMIT and EIA Immunoassays
Source: Research Square preprint supplement (doi:10.21203/rs.3.rs-7529927/v1), 2025-09-17
Supplement: Supplementary file 1 [file 719b616a17736f54886be924.docx]

**Table S1.** Results of MTX determination using EMIT, EIA and LC-MS/MS assays [n=53].

| Sample  ID | Analytical Methodology with Determined Concentration [μmol/L] | | |
| --- | --- | --- | --- |
| **EMIT (Syva® SIEMENS)** | **EIA (ARKTM)** | **LC-MS/MS** |
| 1 | 0,054 | 0,120 | 0,049 |
| 2 | 0,064 | 0,100 | 0,078 |
| 3 | 0,322 | 0,330 | 0,363 |
| 4 | 0,135 | 0,120 | 0,146 |
| 5 | 0,138 | 0,110 | 0,104 |
| 6 | 0,586 | 0,590 | 0,541 |
| 7 | 0,026 | 0,050 | 0,029 |
| 8 | 0,318 | 0,370 | 0,308 |
| 9 | 0,111 | 0,120 | 0,167 |
| 10 | 0,086 | 0,060 | 0,746 |
| 11 | 0,046 | 0,110 | 0,024 |
| 12 | 0,204 | 0,180 | 0,332 |
| 13 | 0,083 | 0,190 | 0,174 |
| 14 | 0,406 | 0,340 | 0,228 |
| 15 | 0,646 | 1,000 | 0,829 |
| 16 | 0,330 | 0,360 | 0,266 |
| 17 | 0,348 | 0,390 | 0,265 |
| 18 | 0,297 | 0,260 | 0,275 |
| 19 | 0,549 | 0,660 | 0,433 |
| 20 | 0,519 | 0,710 | 0,526 |
| 21 | 0,114 | 0,110 | 0,099 |
| 22 | 0,096 | 0,080 | 0,094 |
| 23 | 0,161 | 0,170 | 0,164 |
| 24 | 0,276 | 0,270 | 0,282 |
| 25 | 0,096 | 0,150 | 0,087 |
| 26 | 0,088 | 0,080 | 0,086 |
| 27 | 0,095 | 0,090 | 0,090 |
| 28 | 0,526 | 0,630 | 0,580 |
| 29 | 0,154 | 0,150 | 0,200 |
| 30 | 0,068 | 0,050 | 0,040 |
| 31 | 0,125 | 0,130 | 0,228 |
| 32 | 0,051 | 0,040 | 0,060 |
| 33 | 0,092 | 0,130 | 0,134 |
| 34 | 0,214 | 0,260 | 0,280 |
| 35 | 0,148 | 0,130 | 0,163 |
| 36 | 0,080 | 0,080 | 0,068 |
| 37 | 0,263 | 0,690 | 0,280 |
| 38 | 0,097 | 0,100 | 0,086 |
| 39 | 0,381 | 0,370 | 0,308 |
| 40 | 0,119 | 0,130 | 0,238 |
| 41 | 3,191 | 5,520 | 5,064 |
| 42 | 3,984 | 2,900 | 3,680 |
| 43 | 5,710 | 5,650 | 5,550 |
| 44 | 7,075 | 7,830 | 7,090 |
| 45 | 8,399 | 8,320 | 9,003 |
| 46 | 1,093 | 1,390 | 1,190 |
| 47 | 1,343 | 1,350 | 1,675 |
| 48 | 4,576 | 5,230 | 5,007 |
| 49 | 4,199 | 4,690 | 6,444 |
| 50 | 1,944 | 2,060 | 2,496 |
| 51 | 2,424 | 2,760 | 2,300 |
| 52 | 1,500 | 1,570 | 1,670 |
| 53 | 16,091 | 9,140 | 13,800 |

EMIT - Enzyme-Multiplied Immunoassay, EIA- Homogeneous Enzyme Immunoassay, LC-MS/MS - Liquid Chromatography – Tandem Mass Spectrometry.
